# Supplementary material
Source: Springer Nature journal article supplement (https://www.springermedizin.de/resource/supplementary/12967_2014_1868_MOESM7_ESM.pdf/9575022)

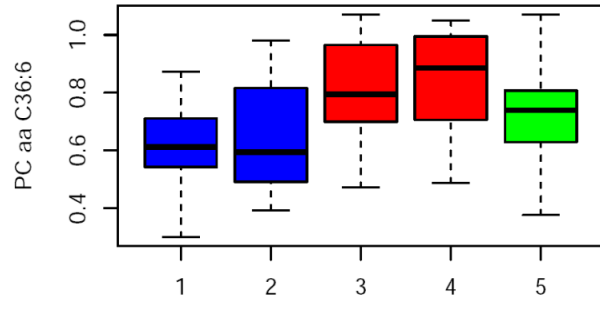

(i)

Supplement: MOESM7 [file 9575022]
